# Supplementary material for: On the dimerization of chlorophyll in photosystem II
Source: Royal Society of Chemistry journal article supplement (doi:10.1039/c1cp21390c), 2011-01-01
Supplement: c1cp21390c.pdf [file c1cp21390c.pdf]

## Electronic Supplementary Information

### On the Dimerization of Chlorophyll in Photosystem II

Sten O. Nilsson Lill\*

Table S1. B3LYP-DCP optimized and experimentally determined<sup>1,2</sup> (in parenthesis) nitrogen-magnesium distances (in Å)

|                            | Mg <sub>D1</sub>                                | Mg <sub>D2</sub>                                |
|----------------------------|-------------------------------------------------|-------------------------------------------------|
| N <sub>I</sub> (pyrrole)   | 2.047 (2.091 <sup>1</sup> /2.018 <sup>2</sup> ) | 2.044 (2.096 <sup>1</sup> /2.022 <sup>2</sup> ) |
| N <sub>II</sub> (pyrrole)  | 2.096 (2.129/2.153)                             | 2.081 (2.118/2.145)                             |
| N <sub>III</sub> (pyrrole) | 2.042 (2.031/2.022)                             | 2.036 (2.051/1.993)                             |
| N <sub>IV</sub> (pyrrole)  | 2.166 (2.137/2.238)                             | 2.149 (2.122/2.235)                             |
| N(histidine)               | 2.156 (2.240/2.233)                             | 2.175 (2.220/2.180)                             |
| Vinyl C=C                  | 3.529 (3.936/4.394)                             | 3.206 (2.718/3.430)                             |
|                            | 4.384 (4.882/5.216)                             | 3.268 (3.868/3.841)                             |

- 1 B. Loll, J. Kern, W. Saenger, A. Zouni, A. and J. Biesiadka. *Nature*, 2005, **438**, 1040-1044.
- 2 Y. Umena, K. Kawakami, J.-R. Shen, and N. Kamiya. *Nature*, 2011, **473**, 55-61

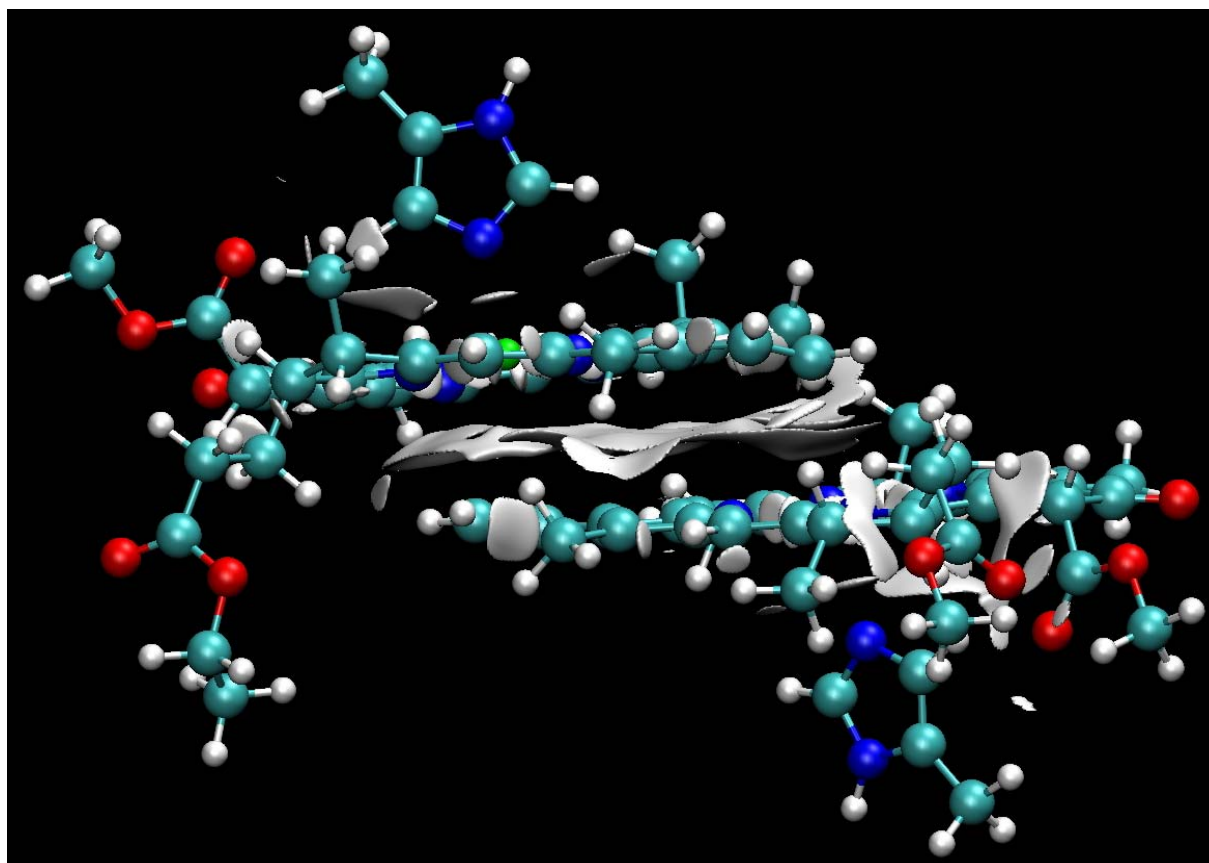

Figure S1. Sideview of non-covalent interactions (NCI) plot of the B3LYP-DCP optimized chlorophyll dimer illustrating the region of overlap between the porphyrin rings. Isosurface of reduced density gradient set to 0.3.

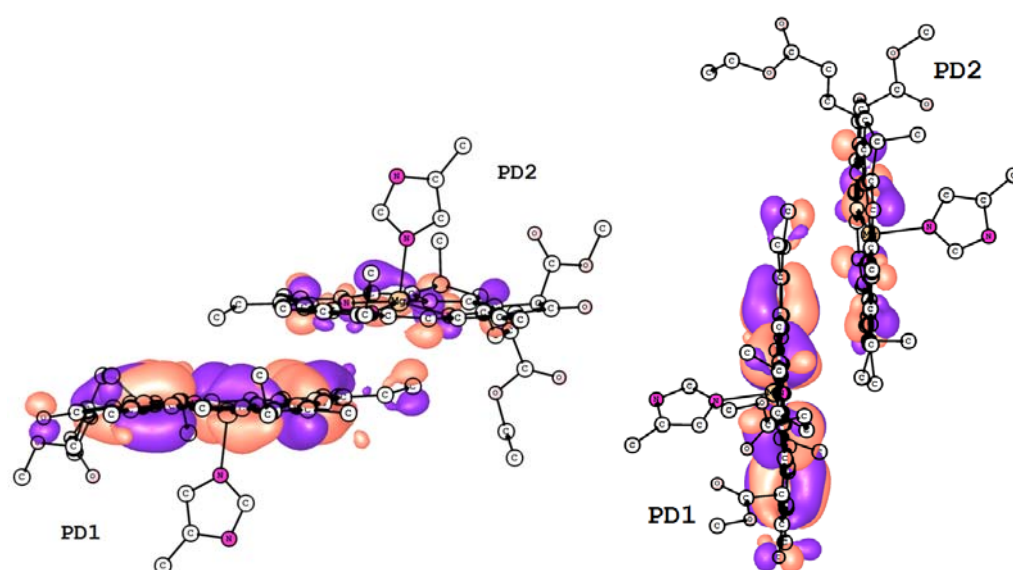

Figure S2. Sideview of the HOMO of the B3LYP-DCP optimized chlorophyll dimer.

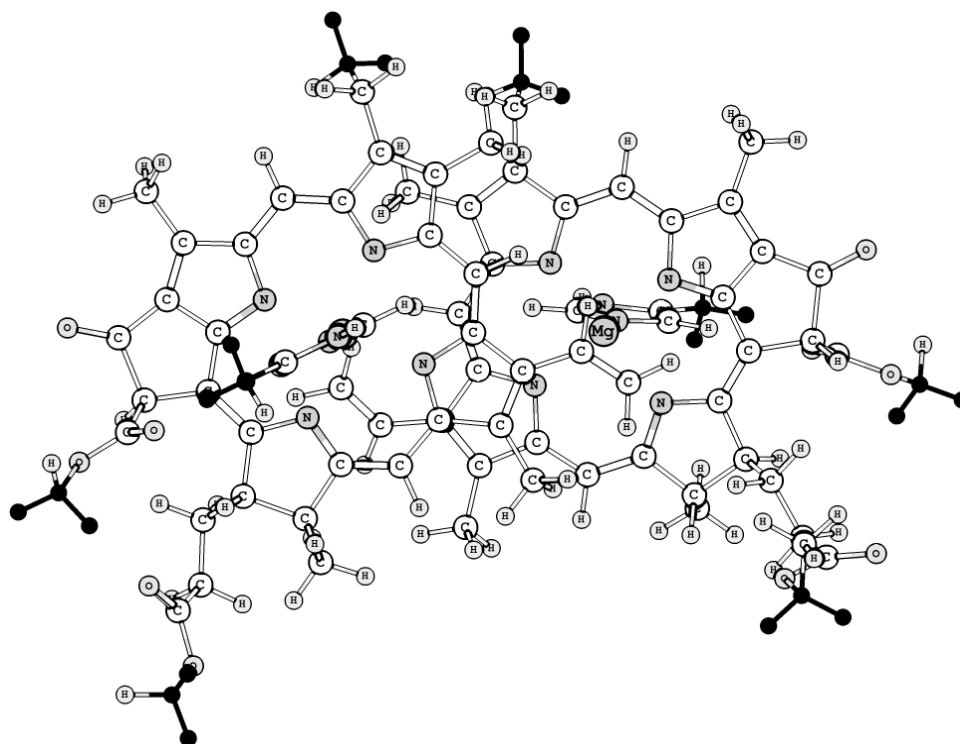

Figure S3. Structure of the chlorophyll dimer. Atoms marked in black were initially held fixed in the position taken from the X-ray structures.

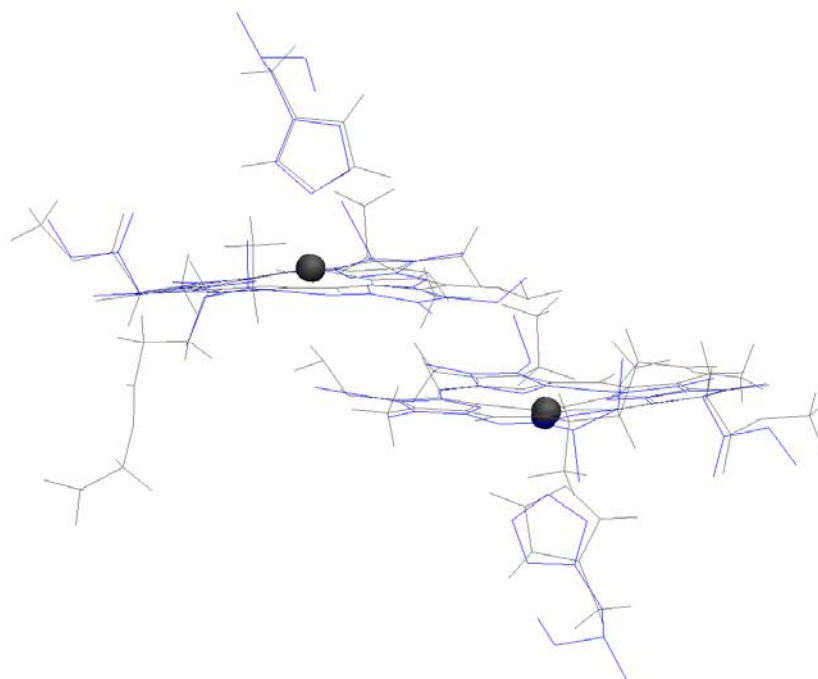

Figure S4. Sideview of the overlay of crystal structure (red, 3.0 Å) used in the present study with the more recent crystal structure (blue, 1.9 Å).

Cartesian coordinates of B3LYP-DCP optimized chlorophyll dimer:

|    |              |              |              |
|----|--------------|--------------|--------------|
| 6  | -7.255151000 | -0.621957000 | 4.853430000  |
| 6  | -6.026896000 | -0.149263000 | 4.157090000  |
| 7  | -4.904309000 | 0.330483000  | 4.814266000  |
| 6  | -5.717127000 | -0.069127000 | 2.825583000  |
| 6  | -3.979514000 | 0.675922000  | 3.878712000  |
| 7  | -4.442666000 | 0.444383000  | 2.666576000  |
| 1  | -7.982156000 | -0.951682000 | 4.107656000  |
| 1  | -7.719977000 | 0.172536000  | 5.450256000  |
| 1  | -4.790345000 | 0.413055000  | 5.813705000  |
| 1  | -6.342277000 | -0.350495000 | 1.991336000  |
| 1  | -3.006835000 | 1.081020000  | 4.117629000  |
| 6  | 7.193564000  | 1.675005000  | -5.119054000 |
| 6  | 5.924611000  | 1.545225000  | -4.350795000 |
| 7  | 4.672991000  | 1.808509000  | -4.885595000 |
| 6  | 5.682883000  | 1.177609000  | -3.053271000 |
| 6  | 3.743677000  | 1.595700000  | -3.914384000 |
| 7  | 4.325245000  | 1.213589000  | -2.795915000 |
| 1  | 8.031909000  | 1.402053000  | -4.473953000 |
| 1  | 7.358607000  | 2.701697000  | -5.468732000 |
| 1  | 4.480765000  | 2.108935000  | -5.829771000 |
| 1  | 6.409756000  | 0.896932000  | -2.305450000 |
| 1  | 2.681395000  | 1.727920000  | -4.061244000 |
| 12 | -3.512936000 | 0.805035000  | 0.754808000  |
| 6  | -6.420404000 | -0.283383000 | -0.735940000 |
| 6  | -2.222741000 | -2.320923000 | 0.396419000  |
| 6  | -0.429486000 | 2.005055000  | 1.628877000  |
| 6  | -4.677692000 | 4.076773000  | 0.548912000  |
| 7  | -4.249526000 | -1.051803000 | -0.081619000 |
| 6  | -5.513952000 | -1.298764000 | -0.535788000 |
| 6  | -5.762473000 | -2.782150000 | -0.711667000 |
| 6  | -4.369230000 | -3.393128000 | -0.446239000 |
| 6  | -3.546327000 | -2.196912000 | 0.001217000  |
| 6  | -4.383130000 | -4.538671000 | 0.567857000  |
| 6  | -6.354601000 | -3.164838000 | -2.072401000 |
| 6  | -6.455639000 | -4.674814000 | -2.287158000 |
| 6  | -7.361737000 | -5.354425000 | -1.291271000 |
| 8  | -8.230648000 | -4.809523000 | -0.639747000 |
| 8  | -7.107861000 | -6.678235000 | -1.217475000 |
| 7  | -1.637218000 | 0.000688000  | 0.913410000  |
| 6  | -1.327235000 | -1.315702000 | 0.803014000  |
| 6  | 0.052605000  | -1.542472000 | 1.177641000  |
| 6  | 0.574788000  | -0.309594000 | 1.505466000  |
| 6  | -0.510251000 | 0.648974000  | 1.350962000  |
| 6  | 0.722479000  | -2.871436000 | 1.253523000  |
| 6  | 1.907936000  | 0.048324000  | 1.938636000  |
| 6  | 3.008749000  | -0.725345000 | 1.923615000  |
| 7  | -2.681175000 | 2.715045000  | 0.986478000  |
| 6  | -1.442781000 | 2.970010000  | 1.481819000  |
| 6  | -1.312065000 | 4.368557000  | 1.826869000  |
| 6  | -2.514539000 | 4.956199000  | 1.519614000  |
| 6  | -3.360292000 | 3.909135000  | 0.986298000  |
| 6  | -0.107333000 | 4.987191000  | 2.455721000  |
| 6  | -2.911024000 | 6.390008000  | 1.676686000  |
| 6  | -2.809322000 | 7.196665000  | 0.371461000  |
| 7  | -5.085547000 | 1.767199000  | -0.123367000 |
| 6  | -5.513154000 | 3.078200000  | 0.038475000  |
| 6  | -6.908687000 | 3.203575000  | -0.304894000 |
| 6  | -7.301944000 | 1.915631000  | -0.645610000 |
| 6  | -6.159040000 | 1.084858000  | -0.510491000 |
| 6  | -7.736717000 | 4.443971000  | -0.277193000 |
| 6  | -8.441488000 | 1.097117000  | -0.986072000 |
| 8  | -9.611277000 | 1.393677000  | -1.168868000 |
| 6  | -7.894129000 | -0.387258000 | -1.076508000 |
| 6  | -8.660981000 | -1.231897000 | -0.089977000 |

|    |               |              |              |
|----|---------------|--------------|--------------|
| 8  | -8.381862000  | -1.331642000 | 1.093090000  |
| 8  | -9.709768000  | -1.829238000 | -0.664291000 |
| 6  | -10.538755000 | -2.616576000 | 0.209426000  |
| 6  | -7.957768000  | -7.424567000 | -0.328155000 |
| 1  | -1.822051000  | -3.327683000 | 0.369586000  |
| 1  | 0.525449000   | 2.376212000  | 1.980167000  |
| 1  | -5.100891000  | 5.072771000  | 0.634354000  |
| 1  | -6.462013000  | -3.103988000 | 0.069787000  |
| 1  | -3.938149000  | -3.763548000 | -1.388247000 |
| 1  | -3.376837000  | -4.926455000 | 0.754773000  |
| 1  | -4.793408000  | -4.197446000 | 1.524392000  |
| 1  | -4.995166000  | -5.375145000 | 0.215154000  |
| 1  | -7.351792000  | -2.735797000 | -2.183989000 |
| 1  | -5.730852000  | -2.742669000 | -2.869813000 |
| 1  | -6.870746000  | -4.883855000 | -3.282479000 |
| 1  | -5.478960000  | -5.167034000 | -2.264943000 |
| 1  | 1.268854000   | -2.976017000 | 2.198855000  |
| 1  | 0.001600000   | -3.691344000 | 1.201663000  |
| 1  | 1.447767000   | -3.016097000 | 0.445843000  |
| 1  | 2.030809000   | 1.066637000  | 2.299240000  |
| 1  | 3.957006000   | -0.331894000 | 2.273313000  |
| 1  | -0.177783000  | 6.078021000  | 2.474675000  |
| 1  | 0.020564000   | 4.650210000  | 3.493183000  |
| 1  | 0.806838000   | 4.723480000  | 1.916865000  |
| 1  | -3.939339000  | 6.450349000  | 2.055298000  |
| 1  | -2.284867000  | 6.863854000  | 2.441124000  |
| 1  | -3.142748000  | 8.230128000  | 0.520869000  |
| 1  | -1.776337000  | 7.225221000  | 0.010505000  |
| 1  | -3.422776000  | 6.751344000  | -0.418168000 |
| 1  | -8.796719000  | 4.198193000  | -0.374143000 |
| 1  | -7.596099000  | 5.005327000  | 0.653535000  |
| 1  | -7.474630000  | 5.118004000  | -1.103251000 |
| 1  | -8.108693000  | -0.739871000 | -2.089615000 |
| 1  | -11.360290000 | -2.968549000 | -0.414313000 |
| 1  | -9.967316000  | -3.458850000 | 0.601948000  |
| 1  | -10.915169000 | -1.998715000 | 1.028129000  |
| 1  | -7.612726000  | -8.456203000 | -0.393351000 |
| 1  | -7.862898000  | -7.049589000 | 0.693770000  |
| 12 | 3.382349000   | 0.773834000  | -0.885941000 |
| 6  | 6.504350000   | 0.063714000  | 0.349487000  |
| 6  | 2.992719000   | -2.500889000 | -1.688680000 |
| 6  | 0.155891000   | 1.421499000  | -1.740660000 |
| 6  | 3.720881000   | 4.048590000  | 0.248717000  |
| 7  | 4.597170000   | -0.984322000 | -0.655820000 |
| 6  | 5.877585000   | -1.033467000 | -0.191793000 |
| 6  | 6.459593000   | -2.423248000 | -0.320310000 |
| 6  | 5.426572000   | -3.126361000 | -1.227203000 |
| 6  | 4.244738000   | -2.171074000 | -1.186492000 |
| 6  | 5.931997000   | -3.300821000 | -2.664972000 |
| 6  | 6.596809000   | -3.085524000 | 1.058541000  |
| 6  | 7.297608000   | -4.451028000 | 0.980229000  |
| 6  | 7.408355000   | -5.073778000 | 2.347733000  |
| 8  | 8.416751000   | -5.101266000 | 3.025523000  |
| 8  | 6.220629000   | -5.575958000 | 2.752188000  |
| 7  | 1.802259000   | -0.361529000 | -1.513510000 |
| 6  | 1.850438000   | -1.680851000 | -1.809256000 |
| 6  | 0.565799000   | -2.124418000 | -2.303058000 |
| 6  | -0.262502000  | -1.021893000 | -2.309811000 |
| 6  | 0.544438000   | 0.091818000  | -1.821049000 |
| 6  | 0.231897000   | -3.532074000 | -2.667784000 |
| 6  | -1.641341000  | -1.026575000 | -2.761592000 |
| 6  | -2.617135000  | -0.134324000 | -2.527050000 |
| 7  | 2.134535000   | 2.429050000  | -0.702298000 |
| 6  | 0.888997000   | 2.510401000  | -1.231859000 |
| 6  | 0.411397000   | 3.875712000  | -1.198222000 |
| 6  | 1.416127000   | 4.620446000  | -0.633163000 |
| 6  | 2.491532000   | 3.698847000  | -0.324869000 |

|   |              |              |              |
|---|--------------|--------------|--------------|
| 6 | -0.910094000 | 4.339197000  | -1.714183000 |
| 6 | 1.457787000  | 6.103203000  | -0.451956000 |
| 6 | 2.050838000  | 6.821728000  | -1.675521000 |
| 7 | 4.714422000  | 1.827031000  | 0.237264000  |
| 6 | 4.789553000  | 3.183011000  | 0.509670000  |
| 6 | 6.105694000  | 3.528047000  | 0.996941000  |
| 6 | 6.813393000  | 2.331363000  | 0.973835000  |
| 6 | 5.919409000  | 1.337040000  | 0.497588000  |
| 6 | 6.585759000  | 4.878266000  | 1.411365000  |
| 6 | 8.113590000  | 1.731847000  | 1.172475000  |
| 8 | 9.168519000  | 2.213587000  | 1.551149000  |
| 6 | 7.955861000  | 0.205515000  | 0.756083000  |
| 6 | 8.896647000  | -0.046341000 | -0.394614000 |
| 8 | 8.663333000  | 0.238640000  | -1.556276000 |
| 8 | 10.049400000 | -0.597865000 | 0.016508000  |
| 6 | 11.060769000 | -0.756053000 | -0.993036000 |
| 6 | 6.176480000  | -6.121973000 | 4.092589000  |
| 6 | 5.997106000  | -5.022876000 | 5.125515000  |
| 1 | 6.861507000  | -4.354494000 | 5.137541000  |
| 1 | 2.883304000  | -3.521498000 | -2.042918000 |
| 1 | -0.827734000 | 1.662629000  | -2.117116000 |
| 1 | 3.869032000  | 5.097028000  | 0.489203000  |
| 1 | 7.446924000  | -2.393926000 | -0.797567000 |
| 1 | 5.143207000  | -4.107513000 | -0.828932000 |
| 1 | 5.159662000  | -3.734502000 | -3.307956000 |
| 1 | 6.220485000  | -2.333617000 | -3.090508000 |
| 1 | 6.807973000  | -3.959635000 | -2.691134000 |
| 1 | 7.167748000  | -2.433248000 | 1.727309000  |
| 1 | 5.601123000  | -3.203538000 | 1.500837000  |
| 1 | 6.740323000  | -5.127439000 | 0.324142000  |
| 1 | 8.310666000  | -4.333147000 | 0.586352000  |
| 1 | -0.700546000 | -3.596145000 | -3.234437000 |
| 1 | 1.018411000  | -3.990547000 | -3.277982000 |
| 1 | 0.110170000  | -4.160995000 | -1.775244000 |
| 1 | -1.910498000 | -1.892178000 | -3.365954000 |
| 1 | -3.607237000 | -0.279870000 | -2.946045000 |
| 1 | -1.067931000 | 5.399979000  | -1.508934000 |
| 1 | -0.987787000 | 4.201181000  | -2.800681000 |
| 1 | -1.738322000 | 3.789344000  | -1.256686000 |
| 1 | 0.446174000  | 6.480655000  | -0.266989000 |
| 1 | 2.042243000  | 6.365292000  | 0.437858000  |
| 1 | 2.077479000  | 7.907254000  | -1.524241000 |
| 1 | 3.072266000  | 6.479168000  | -1.871688000 |
| 1 | 1.455351000  | 6.617046000  | -2.571487000 |
| 1 | 7.660525000  | 4.859792000  | 1.605333000  |
| 1 | 6.389053000  | 5.632217000  | 0.639936000  |
| 1 | 6.085128000  | 5.217470000  | 2.327345000  |
| 1 | 8.266414000  | -0.404385000 | 1.609986000  |
| 1 | 11.909469000 | -1.212495000 | -0.484401000 |
| 1 | 10.700131000 | -1.400210000 | -1.798942000 |
| 1 | 11.337079000 | 0.217581000  | -1.404793000 |
| 1 | 5.322003000  | -6.802323000 | 4.076239000  |
| 1 | 7.092443000  | -6.690710000 | 4.270557000  |
| 1 | 5.095498000  | -4.437520000 | 4.919160000  |
| 1 | 5.895424000  | -5.466289000 | 6.122496000  |
| 1 | -9.001167000 | -7.346640000 | -0.643506000 |
| 1 | -2.492006000 | 0.739899000  | -1.902574000 |
| 1 | -7.049133000 | -1.467048000 | 5.522034000  |
| 1 | 3.010516000  | -1.740919000 | 1.552894000  |
| 1 | 7.213483000  | 1.015442000  | -5.995615000 |

Full reference for Gaussian 03, ref. 32

Frisch, M. J. T., G. W.; Schlegel, H. B.; Scuseria, G. E.; Robb, M. A.; Cheeseman, J. R.; Montgomery, Jr., J. A.; Vreven, T.; Kudin, K. N.; Burant, J. C.; Millam, J. M.; Iyengar, S. S.; Tomasi, J.; Barone, V.; Mennucci, B.; Cossi, M.; Scalmani, G.; Rega, N.; Petersson, G. A.; Nakatsuji, H.; Hada, M.; Ehara, M.; Toyota, K.; Fukuda, R.; Hasegawa, J.; Ishida, M.; Nakajima, T.; Honda, Y.; Kitao, O.; Nakai, H.; Klene, M.; Li, X.; Knox, J. E.; Hratchian, H. P.; Cross, J. B.; Bakken, V.; Adamo, C.; Jaramillo, J.; Gomperts, R.; Stratmann, R. E.; Yazyev, O.; Austin, A. J.; Cammi, R.; Pomelli, C.; Ochterski, J. W.; Ayala, P. Y.; Morokuma, K.; Voth, G. A.; Salvador, P.; Dannenberg, J. J.; Zakrzewski, V. G.; Dapprich, S.; Daniels, A. D.; Strain, M. C.; Farkas, O.; Malick, D. K.; Rabuck, A. D.; Raghavachari, K.; Foresman, J. B.; Ortiz, J. V.; Cui, Q.; Baboul, A. G.; Clifford, S.; Cioslowski, J.; Stefanov, B. B.; Liu, G.; Liashenko, A.; Piskorz, P.; Komaromi, I.; Martin, R. L.; Fox, D. J.; Keith, T.; Al-Laham, M. A.; Peng, C. Y.; Nanayakkara, A.; Challacombe, M.; Gill, P. M. W.; Johnson, B.; Chen, W.; Wong, M. W.; Gonzalez, C.; and Pople, J. A. Gaussian 03, Revision D.02, (Gaussian Inc., Wallingford, CT, 2004).
